# Supplementary material for: AMOC Weakening Dominates Global Warming Impacts on Precipitation Over Brazil
Source: Research Square preprint supplement (doi:10.21203/rs.3.rs-6933933/v1), 2025-06-23
Supplement: Supplementary file 1 [file 4494bd6bf4e4df14b3037d67.docx]

Supporting Information for

**AMOC Weakening Dominates Global Warming Impacts on Precipitation Over Brazil**

Isabelle Vilela 1*, Paolo De Luca2, Shunya Koseki3, Thiago Silva 4, Doris Veleda1, Noel Keenlyside3*

*1Department of Oceanography, Federal University of Pernambuco, Recife, Pernambuco, Brazil.*

*2Barcelona Supercomputing Center, Barcelona, Spain.*

*3Geophysical Institute, University of Bergen and Bjerknes Centre for Climate Research, Bergen, Norway*

*4Pernambuco Water and Climate Agency (APAC), Brazil*

* Corresponding author: I. Vilela (Email: isabelle.vilelaoliveira@ufpe.br)

* Corresponding author: N. Keenlyside (Email: Noel.Keenlyside@uib.no)

**Contents of this file**

Text S1 calculation of the skill metrics.

Figures S1-S4.

Table S1-S2.

**Introduction**

his file provides supplementary table, figures and explanation for the additional information used in the main manuscript. These include a comprehensive explanation of the skill measures employed, along with additional figures and a table that describes all the models and simulations.

**Text S1**

We analyzed the annual total precipitation from extreme wet days PRCP when RR > 99th percentile (R99p) by definitions:

Annual total PRCP when RR > 99th percentile:

Let *RRwj* be the daily precipitation amount on a wet day *w (RR ≥ 1.0mm)* in period *i* and let *RRwn99*be the 99th percentile of precipitation on wet days in the 1981-2010 period. If *W* represents the number of wet days in the period, then:

We measure the association between CMIP6 ensemble variable changes using Spearman rank correlation. We avoid distributional assumptions with Spearman rank correlation. Definition of Spearman correlation coefficient:

where i corresponds to each model (from 1 to n), and di is the difference between the ranks of xi and oi (variable x and y, respectively, for time step i).

**Figure S1**


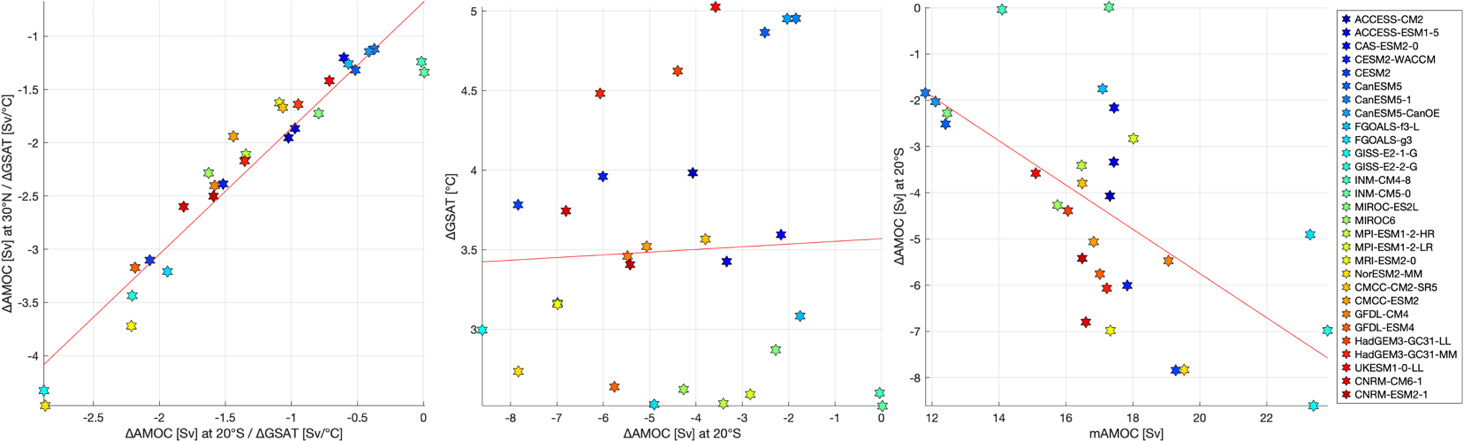


**Figure S1.** Scatter plots between a) ΔAMOC* at 20°S (Sv/°C) and ΔAMOC* at 30°N (Sv/°C) , b) ΔGSAT (°C) against ΔAMOC at 20°S (Sv) and c) ΔAMOC* and ΔPR*, the orange lines are the linear regressions: a (y = 1.18 x - 0.68 with R2: 0.92 ) , b (Y= 0.01x + 3.56 with R2:0), and c (Y = -0.47x -3.82 with R2:0.4). Asterisk indicates that all the variables are divided by ΔGSAT (°C) from each respective CMIP6 model (*).

**Figure S2**


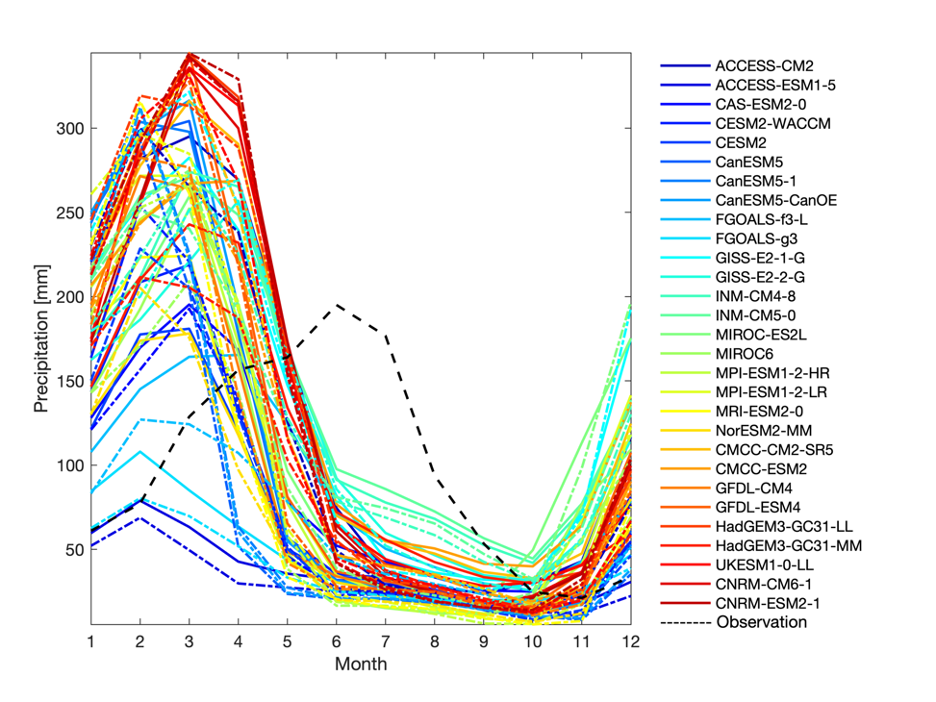


**Figure S2.** Climatology from monthly precipitation data of 29 CMIP6 models over ENEB. Filled lines represent the historical (1950-2000) period and dotted lines represent the SSP-585 scenario (2050-2100). The black dash line is the climatology from observation data of the Drought Monitor project from National Water Agency, and the period is 1959 to 2021.

**Figure S3**


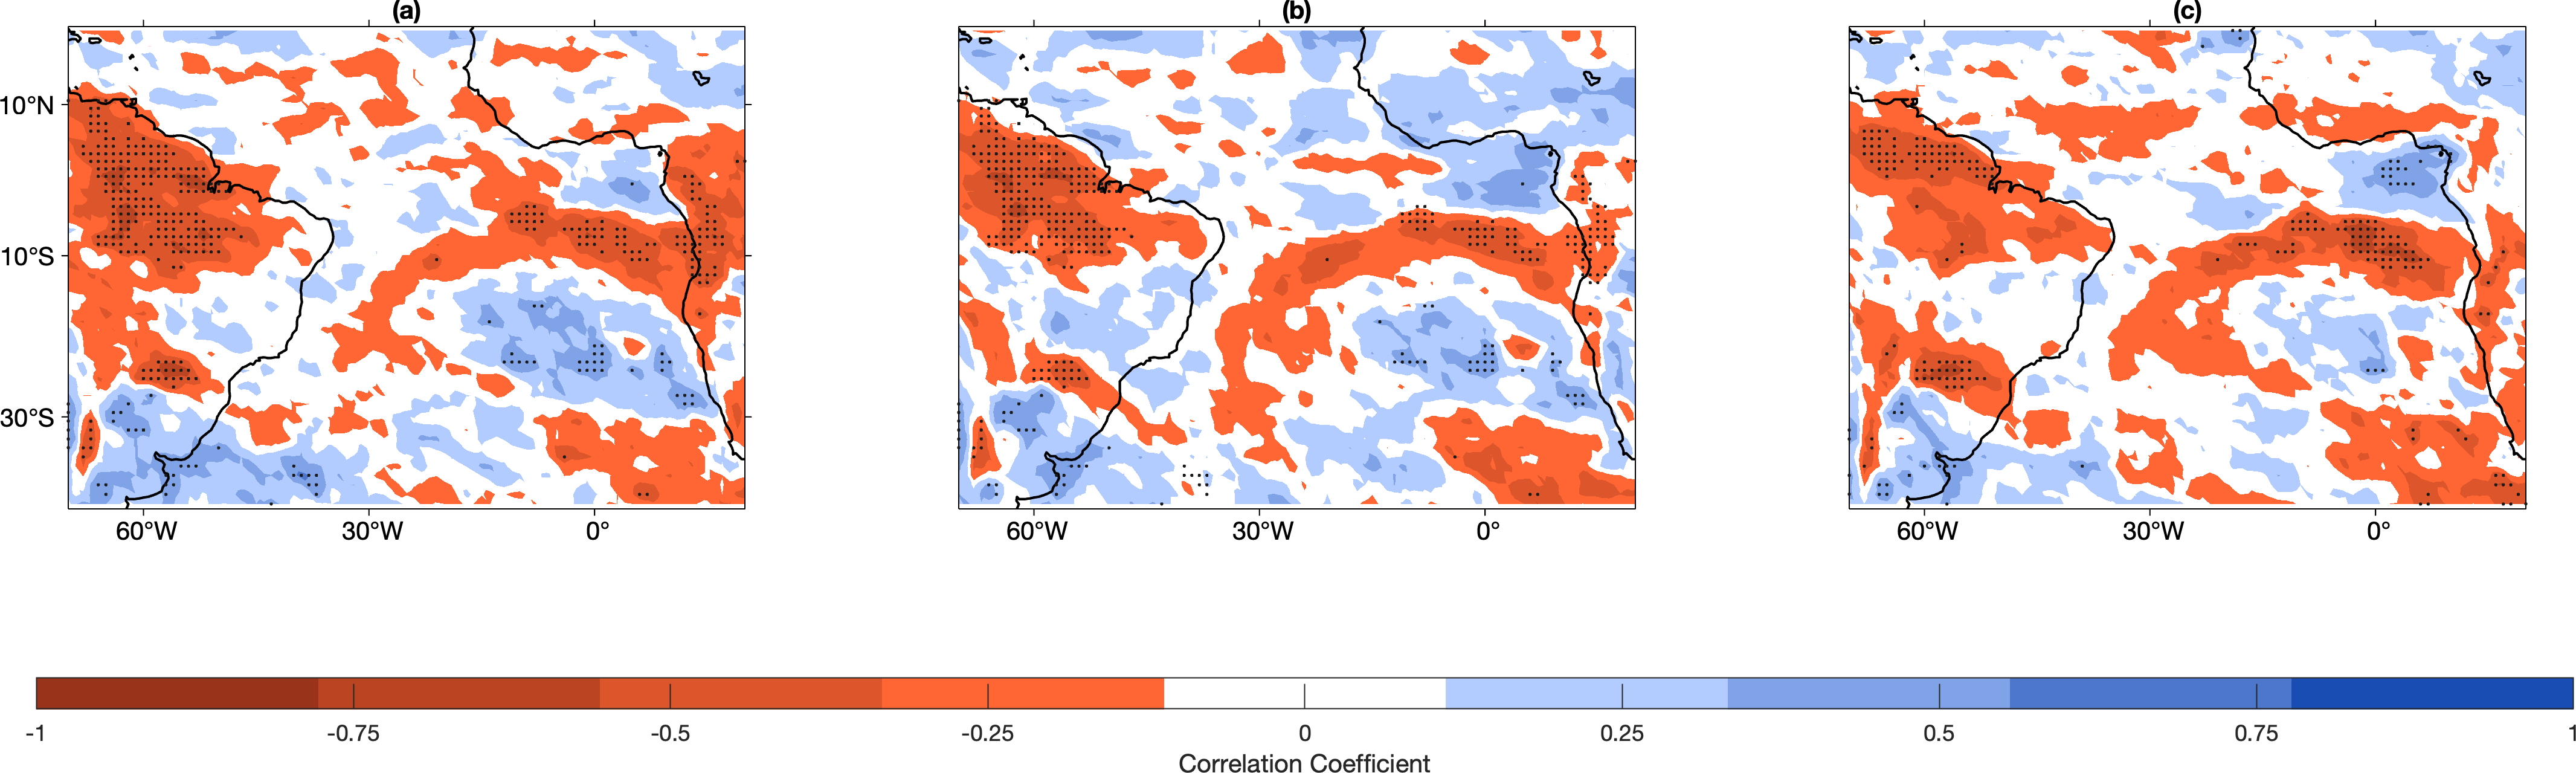


**Figure S3.** Correlation map between ΔAMOC at 20°S changes and a) ΔRx1day, b) ΔRx5day and c) ΔR99p. All the variables are divided by ΔGSAT from each respective CMIP6 model. Stipplings indicate grid cells where the skill measures are statistically significant (p ≤ 0.05).

**Table S1**

**Table S1.** Overview of all models and ensemble members used in this study for all the variables.

| **Institution** | **Models** | **Reference** | **AMOC, SST, PR, LHF Members** | **Rx5day, Rx1day, R99p, R95p**  **Members** | **DOI** |
| --- | --- | --- | --- | --- | --- |
| CSIRO-ARCCSS | ACCESS-CM2 | Bi et al. (2020) | r1i1p1f1 | r1i1p1f1 | <https://doi.org/10.1071/ES19040> |
| CSIRO | ACCESS-ESM1-5 | Ziehn et al. (2020) | r1i1p1f1 | r1i1p1f1 | <https://doi.org/10.1071/ES19035> |
| CCCma | CanESM5-CanOE | Christian et al. (2022) | r1i1p2f1 | - | <https://doi.org/10.5194/gmd-15-4393-2022> |
| CCCma | CanESM5 | Swart et al. (2019) | r1i1p1f1 | r1i1p1f1 | <https://doi.org/10.5194/gmd-12-4823-2019> |
| CCCma | CanESM5-1 | Swart et al. (2019) | r1i1p1f1 | r1i1p1f1 | <https://doi.org/10.5194/gmd-12-4823-2019> |
| CAS | CAS-ESM2-0 | Guangqing et al. (2020) | r1i1p1f1 | - | <https://doi.org/10.11871/jfdc.issn.2096-742X.2020.01.004> |
| NCAR | CESM2 | Danabasoglu et al. (2020) | r4i1p1f1 | r4i1p1f1 | <https://doi.org/10.1029/2019MS001916> |
| NCAR | CESM2-WACCM | Gettelman et al. (2019) | r1i1p1f1 | r1i1p1f1 | <https://doi.org/10.1029/2019JD030943> |
| CMCC | CMCC-CM2-SR5 | Cherchi et al. (2019) | r1i1p1f1 | r1i1p1f1 | <https://doi.org/10.1029/2018MS001369> |
| CMCC | CMCC-ESM2 | Lovato et al. (2022) | r1i1p1f1 | r1i1p1f1 | <https://doi.org/10.1029/2021MS002814> |
| CNRM-CERFACS | CNRM-CM6-1 | Voldoire et al. (2019) | r1i1p1f2 | r1i1p1f2 | <https://doi.org/10.1029/2019MS001683> |
| CNRM-CERFACS | CNRM-ESM2-1 | Séférian et al. (2019) | r1i1p1f2 | r1i1p1f2 | <https://doi.org/10.1029/2019MS001791> |
| CAS | FGOALS-f3-L | He et al. (2020) | r1i1p1f1 | - | <https://doi.org/10.1080/16742834.2020.1778419> |
| CAS | FGOALS-g3 | Pu et al. (2020) | r1i1p1f1 | r1i1p1f1 | <https://doi.org/10.1007/s00376-020-2032-0> |
| NASA-GISS | GISS-E2-1-G | Kelley et al. (2020) | r1i1p1f2 | - | <https://doi.org/10.1029/2019MS002025> |
| NASA-GISS | GISS-E2-2-G | NASA/GISS (2019) | r1i1p3f2 | - | <https://doi.org/10.22033/ESGF/CMIP6.6952> |
| NOAA-GFDL | GFDL-CM4 | Ploshay et al. (2018) | r1i1p1f1 | r1i1p1f1 | <https://doi.org/10.22033/ESGF/CMIP6.11330> |
| NOAA-GFDL | GFDL-ESM2 | Krasting et al. (2018) | r1i1p1f1 | r1i1p1f1 | <https://doi.org/10.22033/ESGF/CMIP6.8597> |
| MOHC | HadGEM3-GC31-LL | Andrews et al. (2020) | r1i1p1f3 | r1i1p1f3 | <https://doi.org/10.1029/2019MS001995> |
| MOHC | HadGEM3-GC31-MM | Andrews et al. (2020) | r1i1p1f3 | - | <https://doi.org/10.1029/2019MS001995> |
| INM | INM-CM4-8 | Volodin et al. (2019) | r1i1p1f1 | r1i1p1f1 | <https://doi.org/10.22033/ESGF/CMIP6.5069> |
| INM | INM-CM5-0 | Volodin et al. (2019) | r1i1p1f1 | r1i1p1f1 | <http://doi.org/10.22033/ESGF/CMIP6.5070> |
| MIROC | MIROC6 | Tatebe et al. (2019) | r1i1p1f1 | r1i1p1f1 | <https://doi.org/10.5194/gmd-12-2727-2019> |
| MIROC | MIROC-ES2L | Hajima et al. (2020) | r1i1p1f2 | r1i1p1f2 | <https://doi.org/10.5194/gmd-13-2197-2020> |
| MPI-M | MPI-ESM1-2-HR | Jungclaus et al. (2019) | r1i1p1f1 | r1i1p1f1 | <https://doi.org/10.22033/ESGF/CMIP6.6594> |
| MPI-M | MPI-ESM1-2-LR | Mauritsen et al. (2019) | r1i1p1f1 | r1i1p1f1 | <https://doi.org/10.1029/2018MS001400> |
| MRI | MRI-ESM2-0 | Yukimoto et al. (2019) | r1i1p1f1 | r1i1p1f1 | <https://doi.org/10.2151/jmsj.2019-051> |
| NCC | NorESM2-MM | Seland et al. (2020) | r1i1p1f1 | r1i1p1f1 | <https://doi.org/10.5194/gmd-13-6165-2020> |
| NIMS-KMA | UKESM1-0-LL | Sellar et al. (2019) | r1i1p1f2 | r1i1p1f2 | <https://doi.org/10.1029/2019MS001946> |

**Table S2**

**Table S2.** Models and measurement of AMOC index change.

| **Model** | ΔAMOC [Sv] at 20°S | AMOC [Sv] mean strength (hist 50y at 20°S ) | ΔAMOC  [ % ] at 20°S | ΔAMOC [Sv] at 30°N | AMOC [Sv] mean strength (hist 50y at 30°N ) | ΔAMOC  [ % ] at 30°N | ΔGSAT [°C] |
| --- | --- | --- | --- | --- | --- | --- | --- |
| ACCESS-CM2 | -4 | 17 | -24 | -7 | 20 | -37 | 3,98 |
| ACCESS-ESM1-5 | -3 | 17 | -19 | -6 | 20 | -30 | 3,43 |
| CAS-ESM2-0 | -2 | 17 | -12 | -4 | 19 | -22 | 3,59 |
| CESM2-WACCM | -6 | 17 | -34 | -9 | 19 | -48 | 3,96 |
| CESM2 | -7 | 19 | -41 | -11 | 21 | -55 | 3,78 |
| CanESM5 | -2 | 12 | -20 | -6 | 14 | -43 | 4,87 |
| CanESM5-1 | -1 | 11 | -16 | -5 | 14 | -38 | 4,95 |
| CanESM5-CanOE | -2 | 12 | -17 | -5 | 14 | -40 | 4,95 |
| FGOALS-f3-L | -1 | 17 | -10 | -3 | 21 | -18 | 3,08 |
| FGOALS-g3 | -4 | 23 | -21 | -8 | 29 | -27 | 2,53 |
| GISS-E2-1-G | -8 | 23 | -37 | -12 | 25 | -50 | 2,99 |
| GISS-E2-2-G | -6 | 23 | -29 | -10 | 26 | -41 | 3,17 |
| INM-CM4-8 | 0 | 14 | 0 | -3 | 16 | -19 | 2,60 |
| INM-CM5-0 | 0 | 17 | 0 | -3 | 18 | -18 | 2,52 |
| MIROC-ES2L | -2 | 12 | -18 | -4 | 12 | -38 | 2,87 |
| MIROC6 | -4 | 15 | -27 | -5 | 14 | -40 | 2,62 |
| MPI-ESM1-2-HR | -3 | 16 | -21 | -5 | 18 | -29 | 2,53 |
| MPI-ESM1-2-LR | -2 | 18 | -16 | -4 | 19 | -21 | 2,59 |
| MRI-ESM2-0 | -6 | 17 | -40 | -11 | 19 | -60 | 3,16 |
| NorESM2-MM | -7 | 19 | -40 | -12 | 23 | -52 | 2,73 |
| CMCC-CM2-SR5 | -3 | 16 | -23 | -5 | 19 | -30 | 3,57 |
| CMCC-ESM2 | -5 | 16 | -30 | -6 | 19 | -34 | 3,52 |
| GFDL-CM4 | -5 | 19 | -29 | -8 | 20 | -41 | 3,46 |
| GFDL-ESM4 | -5 | 17 | -34 | -8 | 21 | -38 | 2,64 |
| HadGEM3-GC31-LL | -4 | 16 | -27 | -7 | 19 | -39 | 4,62 |
| HadGEM3-GC31-MM | -6 | 17 | -35 | -9 | 17 | -56 | 4,48 |
| UKESM1-0-LL | -3 | 15 | -24 | -7 | 18 | -39 | 5,02 |
| CNRM-CM6-1 | -6 | 16 | -41 | -9 | 18 | -53 | 3,74 |
| CNRM-ESM2-1 | -5 | 16 | -33 | -8 | 18 | -46 | 3,41 |
| MME | -4 | 17 | -25 | -7 | 19 | -38 | 3,50 |

**Table S3**

**Table S3.** Models and CLIMPACT indices for ENEB, historical, changes and percentage of change (the H is historical, and the change is in mm).

| Models | r95p_H | Δr95p | r95p_% | r99p_H | Δr99p | r99p_% | rx1  day_H | Δrx1  day | rx1  day_% | rx5  day_H | Δrx5  day | rx5day_% |
| --- | --- | --- | --- | --- | --- | --- | --- | --- | --- | --- | --- | --- |
| ACCESS-CM2 | 376 | 114 | 30 | 113 | 116 | 103 | 70 | 20 | 29 | 167 | 33 | 20 |
| ACCESS-ESM1-5 | 96 | -41 | -43 | 36 | -18 | -51 | 24 | -4 | -17 | 59 | -11 | -19 |
| CESM2-WACCM | 234 | 97 | 42 | 70 | 79 | 112 | 44 | 13 | 29 | 119 | 29 | 24 |
| CESM2 | 221 | 92 | 42 | 73 | 81 | 111 | 43 | 17 | 41 | 113 | 41 | 36 |
| CanESM5 | 369 | -26 | -7 | 137 | 28 | 20 | 88 | 9 | 10 | 190 | -5 | -3 |
| FGOALS-g3 | 170 | -82 | -48 | 64 | -34 | -53 | 45 | -11 | -24 | 80 | -20 | -25 |
| INM-CM4-8 | 288 | 36 | 12 | 107 | -7 | -6 | 45 | 4 | 9 | 123 | -1 | -1 |
| INM-CM5-0 | 445 | ### | -26 | 195 | -80 | -41 | 75 | -12 | -16 | 175 | -34 | -20 |
| MIROC-ES2L | 281 | 56 | 20 | 81 | 28 | 35 | 37 | 3 | 8 | 121 | 8 | 7 |
| MIROC6 | 247 | -20 | -8 | 73 | 16 | 22 | 53 | 5 | 10 | 140 | 2 | 1 |
| MPI-ESM1-2-HR | 223 | 62 | 28 | 62 | 30 | 49 | 40 | 1 | 3 | 122 | 7 | 6 |
| MPI-ESM1-2-LR | 237 | 89 | 37 | 61 | 26 | 42 | 37 | 1 | 2 | 125 | 3 | 2 |
| MRI-ESM2-0 | 222 | 167 | 75 | 64 | 106 | 166 | 44 | 17 | 37 | 121 | 42 | 35 |
| NorESM2-MM | 201 | 47 | 23 | 66 | 41 | 62 | 43 | 5 | 11 | 117 | 10 | 9 |
| CMCC-CM2-SR5 | 362 | 33 | 9 | 117 | 58 | 49 | 52 | 16 | 31 | 130 | 23 | 18 |
| CMCC-ESM2 | 313 | 25 | 8 | 91 | 50 | 55 | 46 | 12 | 26 | 115 | 18 | 16 |
| GFDL-CM4 | 328 | 41 | 12 | 110 | 50 | 46 | 71 | 10 | 15 | 155 | 13 | 8 |
| GFDL-ESM4 | 467 | 3 | 1 | 172 | 22 | 13 | 93 | 5 | 6 | 193 | 5 | 3 |
| HadGEM3-GC31-LL | 395 | 165 | 42 | 120 | 132 | 110 | 73 | 22 | 30 | 173 | 33 | 19 |
| UKESM1-0-LL | 373 | 151 | 41 | 113 | 141 | 125 | 69 | 26 | 37 | 164 | 43 | 26 |
| CNRM-CM6-1 | 324 | 47 | 15 | 91 | 17 | 19 | 59 | 2 | 3 | 153 | 1 | 1 |
| CNRM-ESM2-1 | 316 | 72 | 23 | 88 | 29 | 32 | 59 | 4 | 7 | 155 | 3 | 2 |
